# Supplementary material for: Phylogenomic and Structural Analysis of the Monkeypox Virus Shows Evolution towards Increased Stability
Source: MDPI journal article supplement (doi:10.3390/v15010127), 2022-12-31

Supplementary Figures:

Supp Figure S1. Spreading of MPXV worldwide. A) MPXV outbreaks before 2022. B) MPXV outbreaks in 2022.

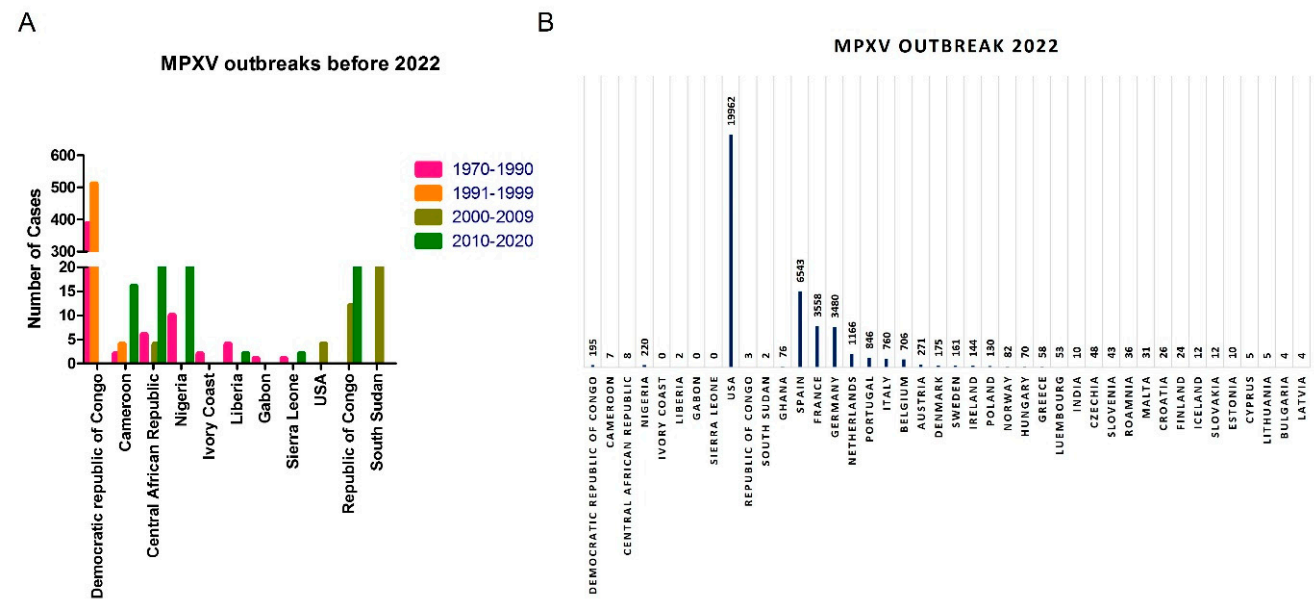

Supp Figure S2. The mapping of gene distribution in MPXV strains sequences

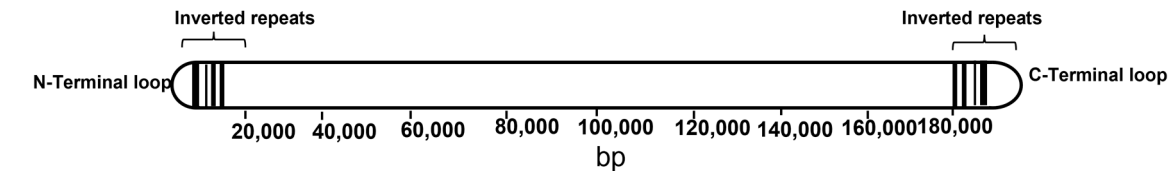

Supp Figure S3. Ramchandran plots for OPG005, OPG153 AND OPG074

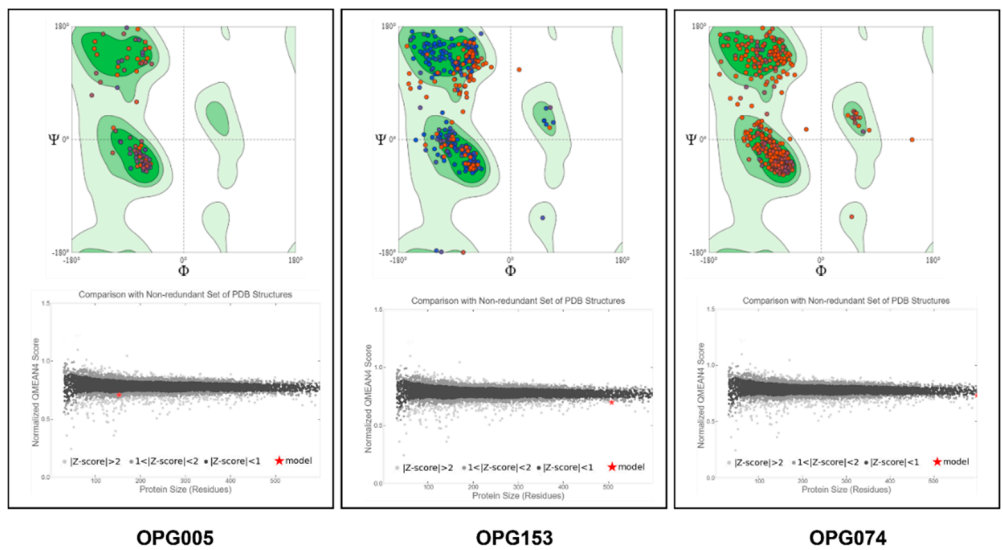

Supplement: s1 [file s1]
